# Supplementary material for: Non-monotonic knotting probability and knot length of semiflexible rings: the competing roles of entropy and bending energy
Source: Royal Society of Chemistry journal article supplement (doi:10.1039/c7sm00643h), 2017-01-01
Supplement: c7sm00643h1.pdf [file c7sm00643h1.pdf]

## Supplementary material for "Non-monotonic knotting probability and knot length of semiflexible rings: the competing roles of entropy and bending energy"

Lucia Coronel,<sup>a</sup> Enzo Orlandini,<sup>b</sup> and Cristian Micheletti<sup>a</sup>

<sup>a</sup> SISSA, International School for Advanced Studies, via Bonomea 265, I-34136 Trieste, Italy and

<sup>b</sup> Dipartimento di Fisica e Astronomia "Galileo Galilei", sezione CNISM,  
Università degli Studi di Padova, via Marzolo 8, I-35131 Padova, Italy

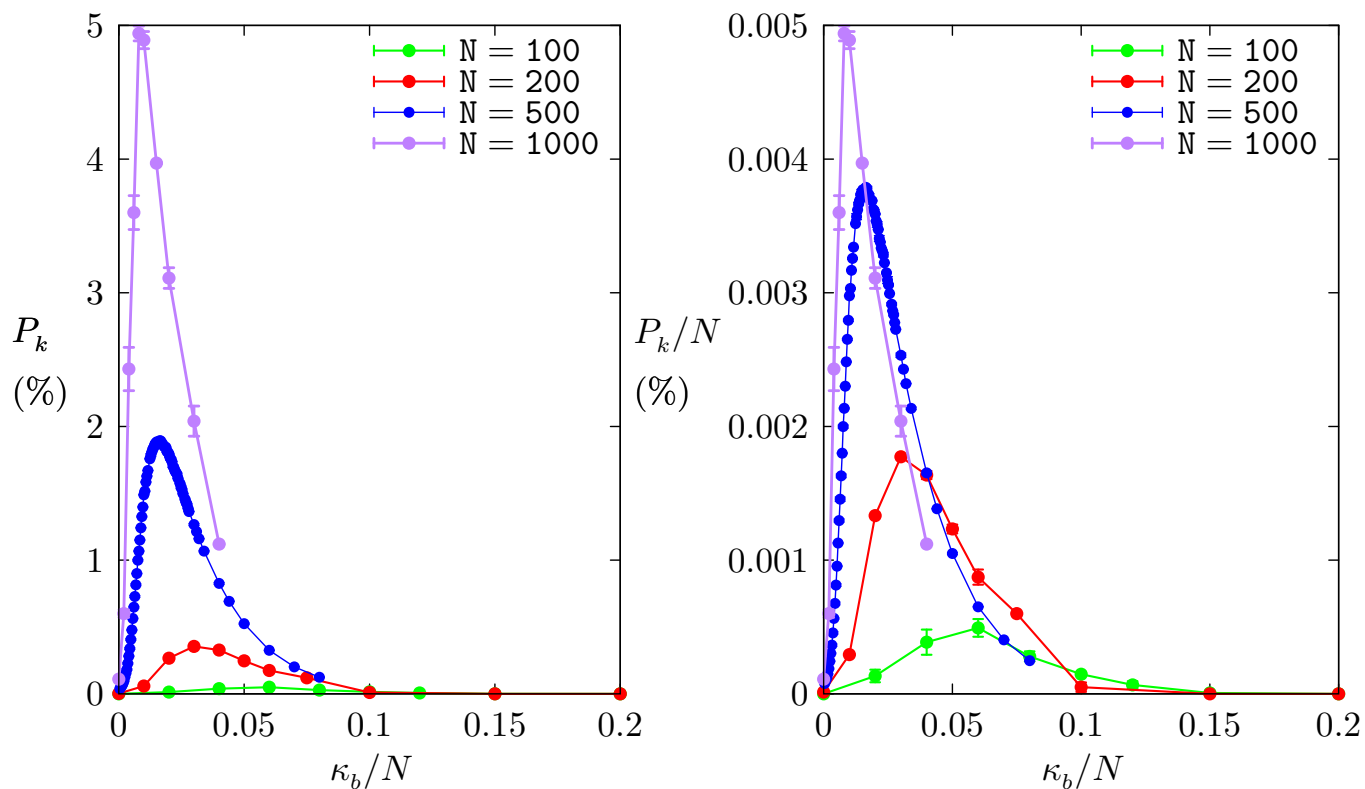

FIG. S1: Left: knotting probability,  $P_k$ , as a function of the rescaled bending rigidity,  $\kappa_b/N$ , for rings of different lengths. The profiles of the rescaled knotting probability,  $P_k/N$  are shown in the right panel.
